# Supplementary material for: Colorimetric screening of elevated urinary mercury levels by a novel Hg2+-selective probe of resorufin phosphinothioate
Source: Royal Society of Chemistry journal article supplement (doi:10.1039/d2ra04093j), 2022-01-01
Supplement: d2ra04093j1.pdf [file d2ra04093j1.pdf]

## Electronic Supplementary Information

### Colorimetric screening of elevated urinary mercury levels by a novel Hg<sup>2+</sup>-selective probe of resorufin phosphinothioate

Myung Gil Choi, Byung Hoon Yun, Hyeong Min Kim, Sangdoo Ahn,\* Suk-Kyu Chang\*

*Department of Chemistry, Chung-Ang University, Seoul 06974, Republic of Korea*

#### Contents

##### Experimental details

- Table S1.** Summary of the optical urinary mercury sensing systems
- Fig. S1.** (a) UV–vis and (b) fluorescence spectra of **MP-1** and its Hg<sup>2+</sup> signaling product **1**.
- Fig. S2.** UV–vis spectra of **MP-1** in the presence of thiophilic metal ions with or without citrate as metal ion scavenger.
- Fig. S3.** Changes in absorbance ratio ( $A_{576}/A_{457}$ ) of **MP-1** in the presence of common anions.
- Fig. S4.** Changes in absorbance ratio ( $A_{576}/A_{457}$ ) of Hg<sup>2+</sup> signaling by **MP-1** in the presence of common anions as background.
- Fig. S5.** Changes in fluorescence intensity at 592 nm of **MP-1** as plotted by intensity ratio  $I/I_0$  in the presence of common anions.
- Fig. S6.** <sup>1</sup>H NMR spectrum of (a) **MP-1**, (b) **MP-1** + Hg<sup>2+</sup>, and (c) resorufin sodium salt in DMSO-*d*<sub>6</sub>.
- Fig. S7.** EI mass spectrum for the Hg<sup>2+</sup> signaling product of **MP-1**.
- Fig. S8.** HPLC evidence of Hg<sup>2+</sup> signaling by **MP-1**.
- Fig. S9.** Time-dependent Hg<sup>2+</sup> signaling of **MP-1** plotted by change in absorbance ratio ( $A_{576}/A_{457}$ ).
- Fig. S10.** Effects of representative urine components urea and creatine on Hg<sup>2+</sup>

signaling of **MP-1** expressed by absorbance ratio ( $A_{576}/A_{457}$ ).

**Fig. S11.** Calibration curve of  $\text{Hg}^{2+}$  analysis in artificial urine by probe **MP-1** as plotted by absorbance ratio ( $A_{576}/A_{457}$ ).

**Fig. S12.** Calibration curve expressed by color channel levels of image for  $\text{Hg}^{2+}$  signaling in artificial urine.

**Fig. S13.**  $^1\text{H}$  NMR spectrum of **MP-1** in  $\text{DMSO}-d_6$  (600 MHz).

**Fig. S14.**  $^{13}\text{C}$  NMR spectrum of **MP-1** in  $\text{DMSO}-d_6$  (150 MHz).

**Fig. S15.** High-resolution FAB mass spectrum of **MP-1**.

## Experimental details

### 1. General

Resorufin sodium salt was procured from Merck KGaA. Dimethylthiophosphinoyl chloride (97.0%) was obtained from TCI. Artificial urine (Sigmatrix Urine Diluent) was purchased from Merck KGaA. Other chemicals (metal salts (97% ~ 99%) and spectroscopic grade solvents (DMF: 99.8%, dichloromethane: 99.8%, acetonitrile: 99.9%) were obtained from Merck KGaA. UV–vis and fluorescence spectra were acquired using Scinco S-3100 and FS-2 spectrophotometers, respectively. High-resolution mass spectrometry (HRMS) data with fast atom bombardment (FAB) ionization were collected using a JEOL JMS-700 mass spectrometer. High-performance liquid chromatography (HPLC) experiments were performed with a Yong In YL9100 Plus HPLC System. Column chromatography was carried out using silica gel (Merck, 240 mesh).

### 2. Estimation of detection limit

The  $\text{Hg}^{2+}$  detection limit was estimated following the IUPAC guidelines ( $3s_{\text{blk}}/m$ ) using a UV–vis spectrophotometer, where  $s_{\text{blk}}$  is the standard deviation of the absorbance ratio at 576 and 457 nm ( $A_{576}/A_{457}$ ) of the probe solution ( $5.0 \mu\text{M}$ ,  $n = 12$ ) and  $m$  is the slope of the titration plot.<sup>S1</sup>

**Table. S1.** Summary of the optical urinary mercury sensing systems

| Material                                                                            | Condition                                        | Signal                          | Interference tested      | Dilution ratio <sup>[a]</sup> | Detection limit (nM) | Ref          |
|-------------------------------------------------------------------------------------|--------------------------------------------------|---------------------------------|--------------------------|-------------------------------|----------------------|--------------|
| 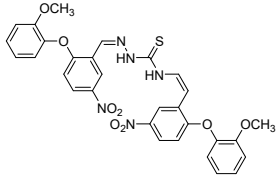   | HEPES buffer (3 mM)<br>/acetonitrile (99:1, v/v) | Colorimetry                     | Metal ions               | 0.003                         | 27                   | S2           |
| DNA-Gold nanoparticles                                                              | pH 7.5 phosphate buffer                          | Colorimetry                     | Metal ions               | 0.1                           | 0.01                 | S3           |
| DNA-Gold nanoclusters                                                               | pH 6.0 phosphate buffer                          | Fluorescence                    | Metal ions               | 0.3                           | 83                   | S4           |
| Carbon dots                                                                         | aqueous solutions                                | Fluorescence                    | Metal ions               | -                             | 201                  | S5           |
|    | 90 % HEPES buffer<br>/DMSO (9:1, v/v)            | Colorimetry and<br>Fluorescence | Metal ions               | 0.1                           | 7.4                  | S6           |
|    | aqueous solution                                 | Fluorescence                    | Metal ions               | 0.01                          | 19                   | S7           |
|   | aqueous solution with<br>neutral pH              | Fluorescence                    | Metal ions               | 0.01                          | 0.8                  | S8           |
|  | pH 7.4 PBS with 20%<br>acetonitrile              | Colorimetry and<br>Fluorescence | Metal ions and<br>anions | 0.5                           | 12                   | This<br>work |

[a] A dilution ratio is the ratio of the volume of urine solution in a total volume of a measuring sample.

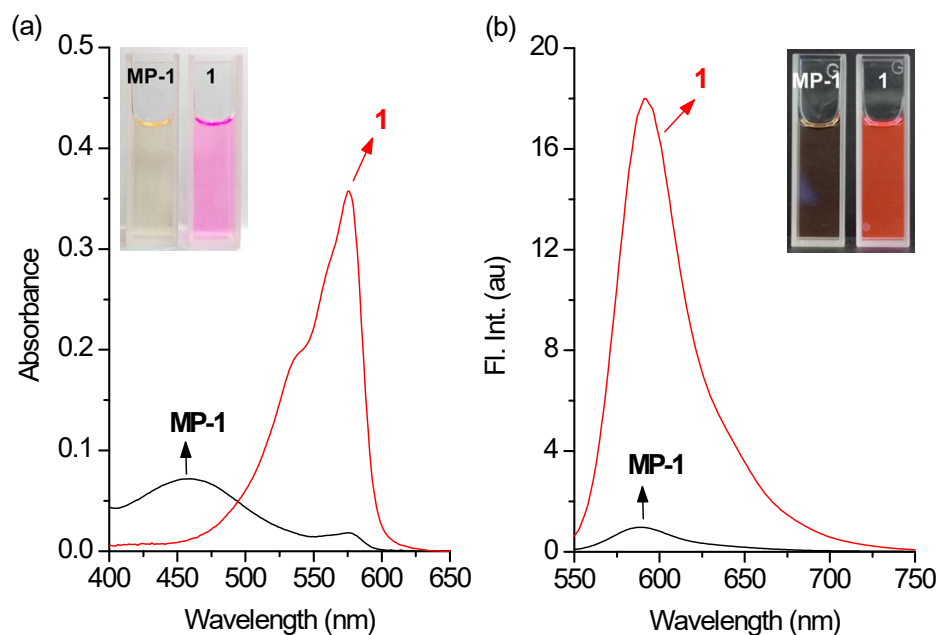

**Fig. S1.** (a) UV-vis and (b) fluorescence spectra of **MP-1** and its  $\text{Hg}^{2+}$  signaling product **1**.  $[\text{MP-1}] = [\mathbf{1}] = 5.0 \mu\text{M}$ ,  $[\text{citrate}] = 5.0 \text{mM}$ ,  $[\text{PBS } 7.4] = 10 \text{mM}$  in aqueous solution containing 20% (v/v) acetonitrile. For (b),  $\lambda_{\text{ex}} = 492 \text{nm}$ .

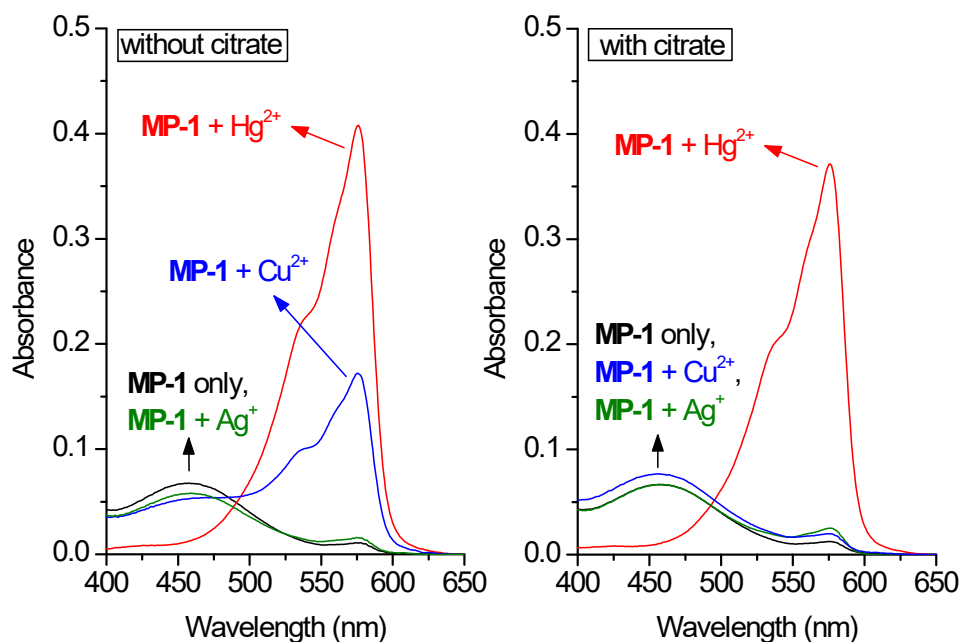

**Fig. S2.** UV-vis spectra of **MP-1** in the presence of thiophilic metal ions with or without citrate as metal ion scavenger.  $[\text{MP-1}] = 5.0 \mu\text{M}$ ,  $[\text{M}^{n+}] = 100 \mu\text{M}$ ,  $[\text{citrate}] = 5.0 \text{mM}$ ,  $[\text{PBS } 7.4] = 10 \text{mM}$  in aqueous solution containing 20% (v/v) acetonitrile.

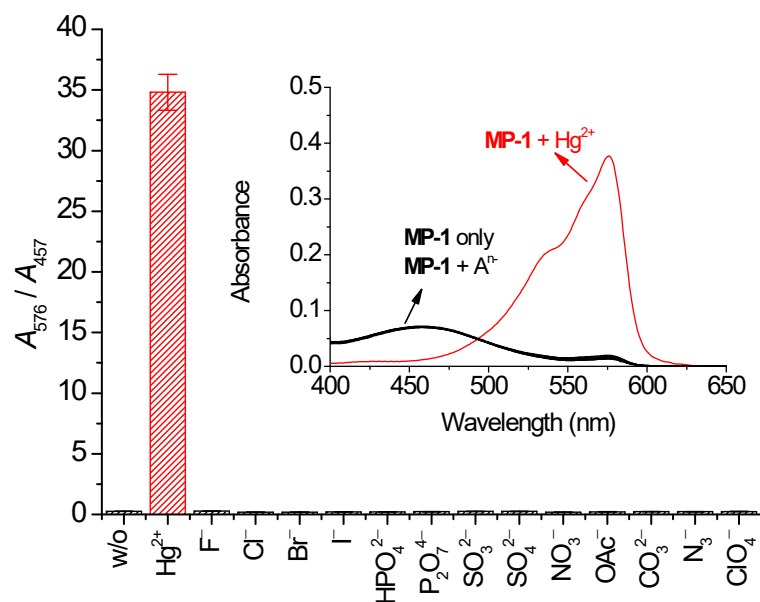

**Fig. S3.** Changes in absorbance ratio ( $A_{576}/A_{457}$ ) of **MP-1** in the presence of common anions. [**MP-1**] = 5.0  $\mu$ M, [ $Hg^{2+}$ ] = [ $A^{n-}$ ] = 100  $\mu$ M, [citrate] = 5.0 mM, [PBS 7.4] = 10 mM in aqueous solution containing 20% (v/v) acetonitrile. Number of measurements ( $n$ ) = 3.

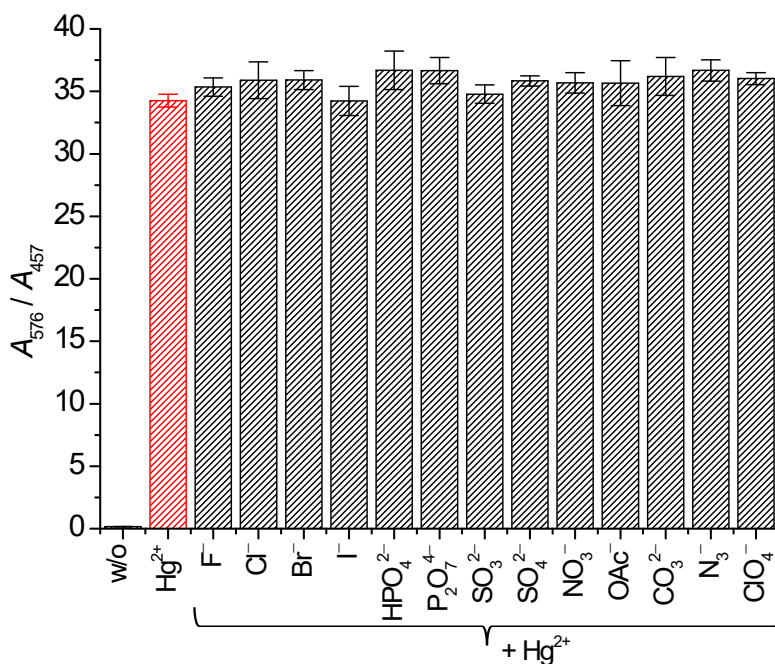

**Fig. S4.** Changes in absorbance ratio ( $A_{576}/A_{457}$ ) of  $Hg^{2+}$  signaling by **MP-1** in the presence of common anions as background. [**MP-1**] = 5.0  $\mu$ M, [ $Hg^{2+}$ ] = [ $A^{n-}$ ] = 100  $\mu$ M, [citrate] = 5.0 mM, [PBS 7.4] = 10 mM in aqueous solution containing 20% (v/v) acetonitrile. Number of measurements ( $n$ ) = 3.

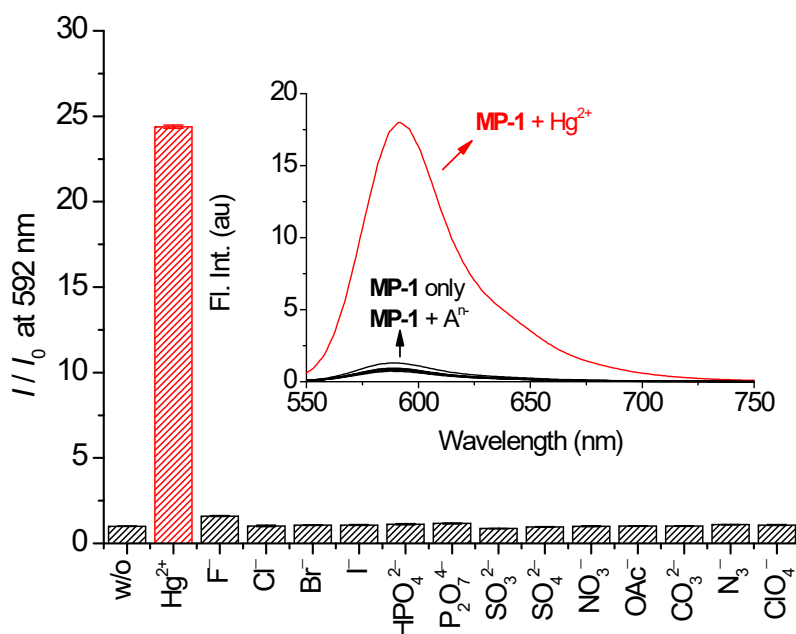

**Fig. S5.** Changes in fluorescence intensity at 592 nm of **MP-1** as plotted by intensity ratio  $I/I_0$  in the presence of common anions. [**MP-1**] = 5.0  $\mu\text{M}$ , [ $\text{Hg}^{2+}$ ] = [ $\text{A}^{n-}$ ] = 100  $\mu\text{M}$ , [citrate] = 5.0 mM, [PBS 7.4] = 10 mM in aqueous solution containing 20% (v/v) acetonitrile.  $\lambda_{\text{ex}}$  = 492 nm. Number of measurements ( $n$ ) = 3.

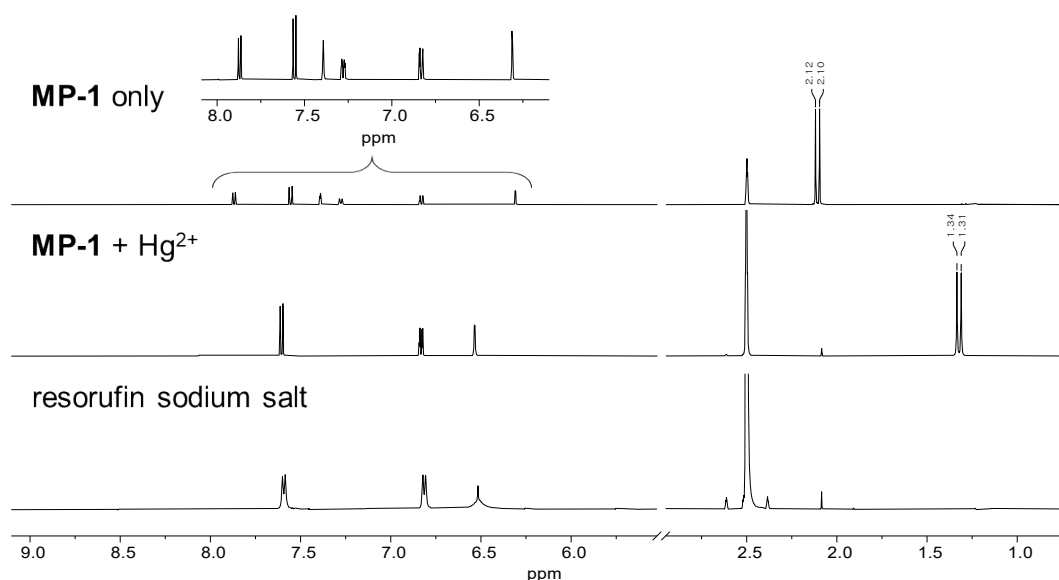

**Fig. S6.**  $^1\text{H}$  NMR spectrum of (a) **MP-1**, (b) **MP-1** +  $\text{Hg}^{2+}$ , and (c) resorufin sodium salt in  $\text{DMSO-}d_6$ . [**MP-1**] = [resorufin sodium salt] = 5.0 mM. For (b), the spectrum (**MP-1** +  $\text{Hg}^{2+}$ ) was obtained using a mixture of **MP-1** (5.0 mM) and  $\text{Hg}(\text{ClO}_4)_2$  (10.0 mM) in  $\text{DMSO-}d_6$ .

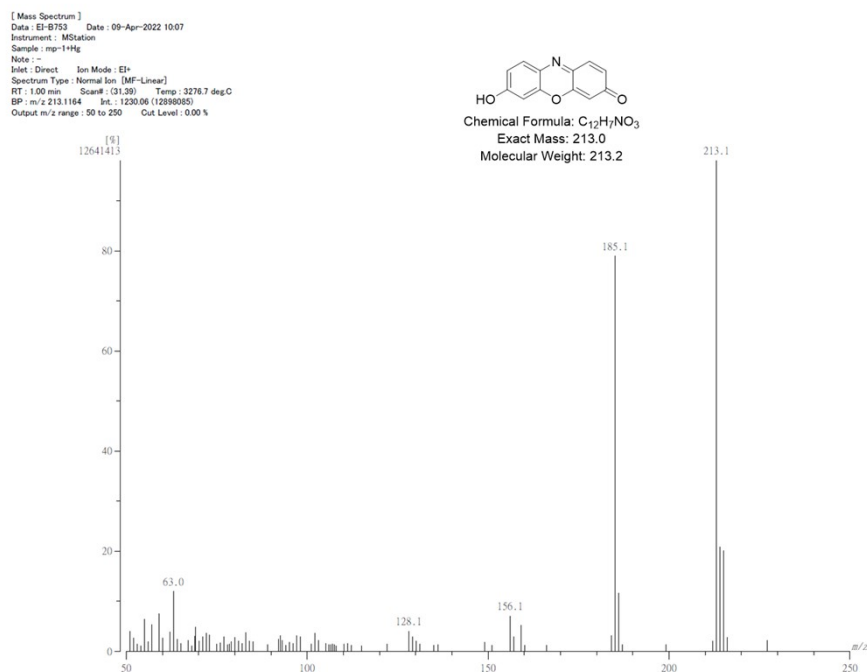

**Fig. S7.** EI mass spectrum for the  $\text{Hg}^{2+}$  signaling product of **MP-1**.

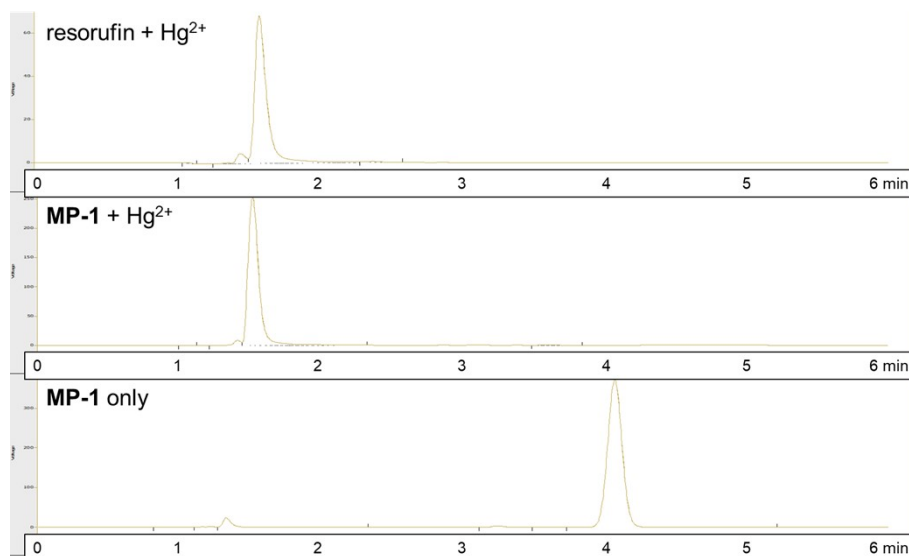

**Fig. S8.** HPLC evidence of  $\text{Hg}^{2+}$  signaling by **MP-1**. The middle chromatogram (**MP-1** +  $\text{Hg}^{2+}$ ) was obtained for the signaling reaction product (condition: [**MP-1**] = 5.0  $\mu\text{M}$ , [ $\text{Hg}^{2+}$ ] = 100  $\mu\text{M}$ , [citrate] = 5.0 mM, [PBS 7.4] = 10 mM in aqueous solution containing 20% (v/v) acetonitrile). Eluent: 50% aq. acetonitrile, column: reversed phase column C18 (Sunfire, 4.6 $\times$ 150 mm), flow rate = 1.0 mL/min.

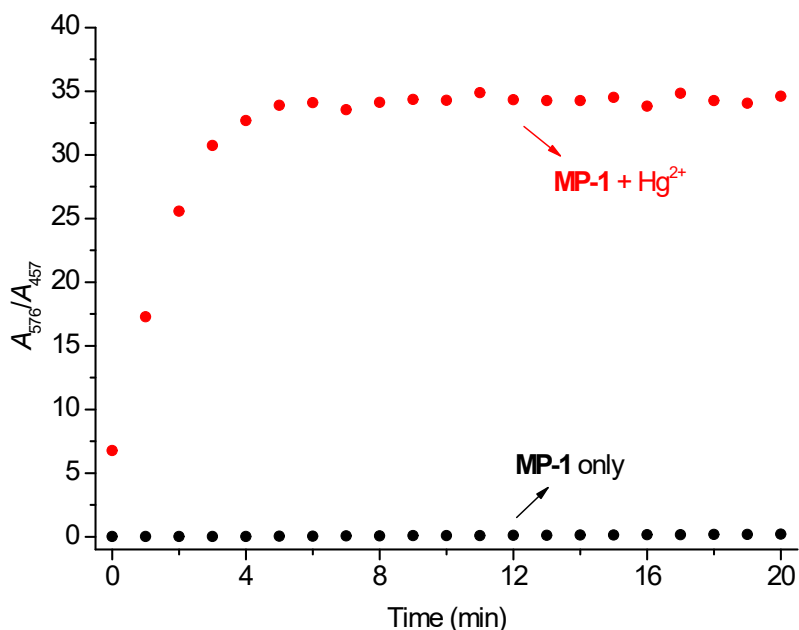

**Fig. S9.** Time-dependent Hg<sup>2+</sup> signaling of **MP-1** plotted by change in absorbance ratio ( $A_{576}/A_{457}$ ). [**MP-1**] = 5.0  $\mu$ M, [Hg<sup>2+</sup>] = 100  $\mu$ M, [citrate] = 5.0 mM, [PBS 7.4] = 10 mM in aqueous solution containing 20% (v/v) acetonitrile.

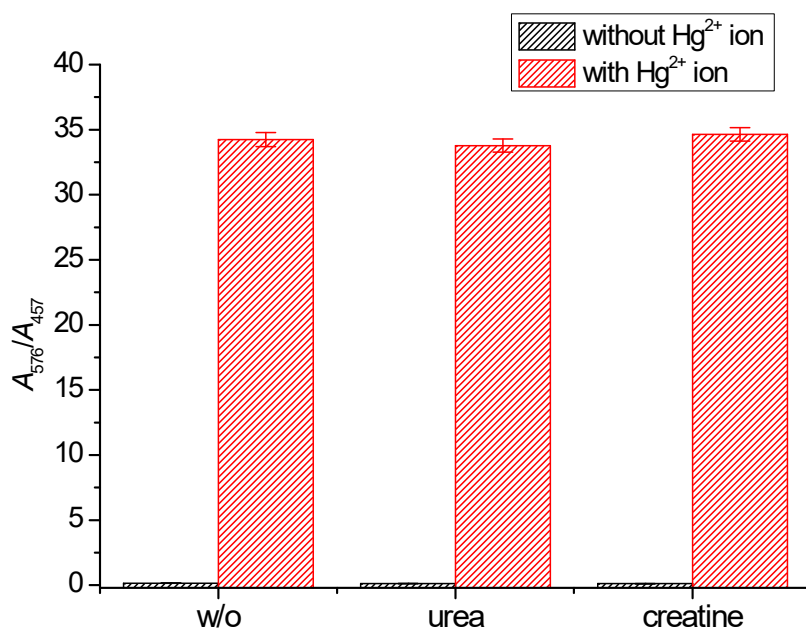

**Fig. S10.** Effects of representative urine components urea and creatine on Hg<sup>2+</sup> signaling of **MP-1** expressed by absorbance ratio ( $A_{576}/A_{457}$ ). [**MP-1**] = 5.0  $\mu$ M, [Hg<sup>2+</sup>] = 100.0  $\mu$ M, [urea] = 178 mM, [creatine] = 7.6 mM, [citrate] = 5.0 mM, [PBS 7.4] = 10 mM in aqueous solution containing 20% (v/v) acetonitrile. Number of measurements ( $n$ ) = 3.



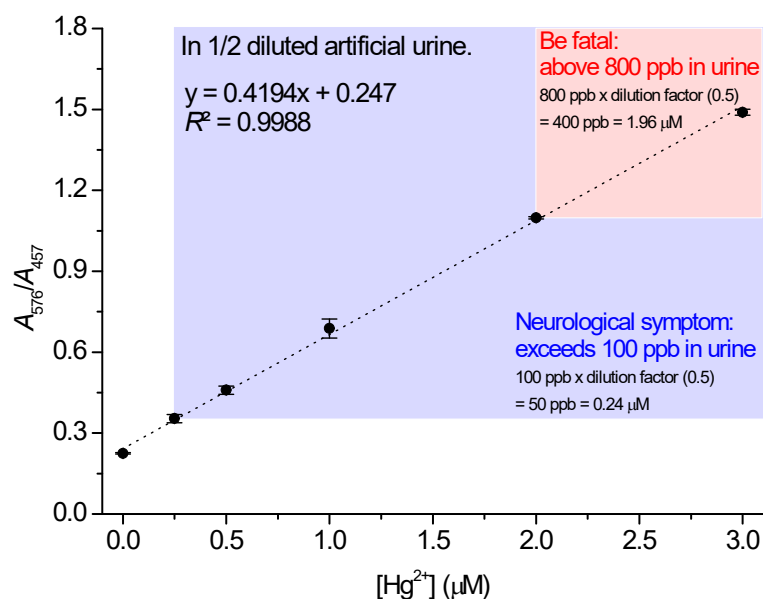

**Fig. S11.** Calibration curve of  $\text{Hg}^{2+}$  analysis in artificial urine by probe **MP-1** as plotted by absorbance ratio ( $A_{576}/A_{457}$ ). [**MP-1**] = 5.0  $\mu\text{M}$ , [ $\text{Hg}^{2+}$ ] = 0–3.0  $\mu\text{M}$ , [citrate] = 5.0 mM, [PBS 7.4] = 10 mM in aqueous solution containing 20% (v/v) acetonitrile. The regions marked in blue and red indicate the neurological symptom and fatal zones, respectively. Number of measurements ( $n$ ) = 3.

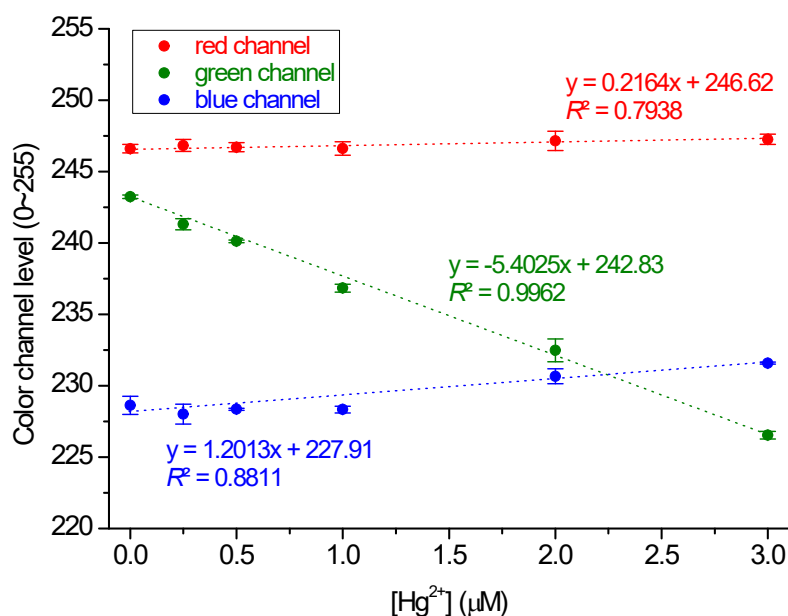

**Fig. S12.** Calibration curve expressed by color channel levels of image for  $\text{Hg}^{2+}$  signaling in artificial urine. [**MP-1**] = 5.0  $\mu\text{M}$ , [ $\text{Hg}^{2+}$ ] = 0–3.0  $\mu\text{M}$ , [citrate] = 5.0 mM, [PBS 7.4] = 10 mM in aqueous solution containing 20% (v/v) acetonitrile. Number of measurements ( $n$ ) = 3.

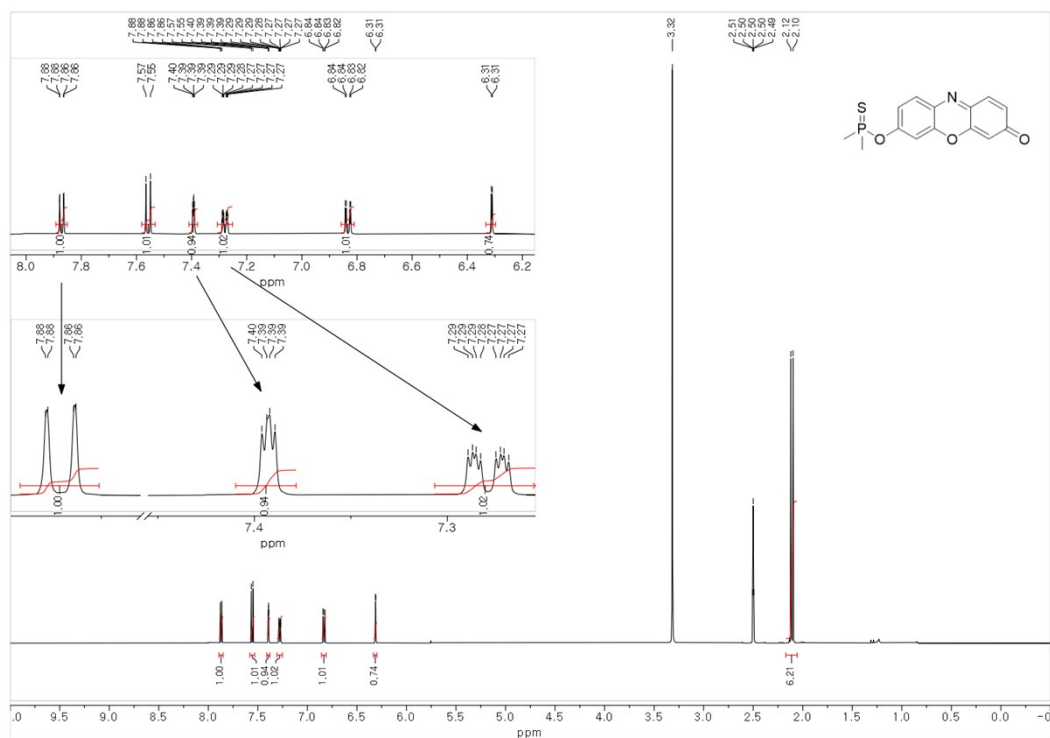

Fig. S13.  $^1\text{H}$  NMR spectrum of MP-1 in  $\text{DMSO-}d_6$  (600 MHz).

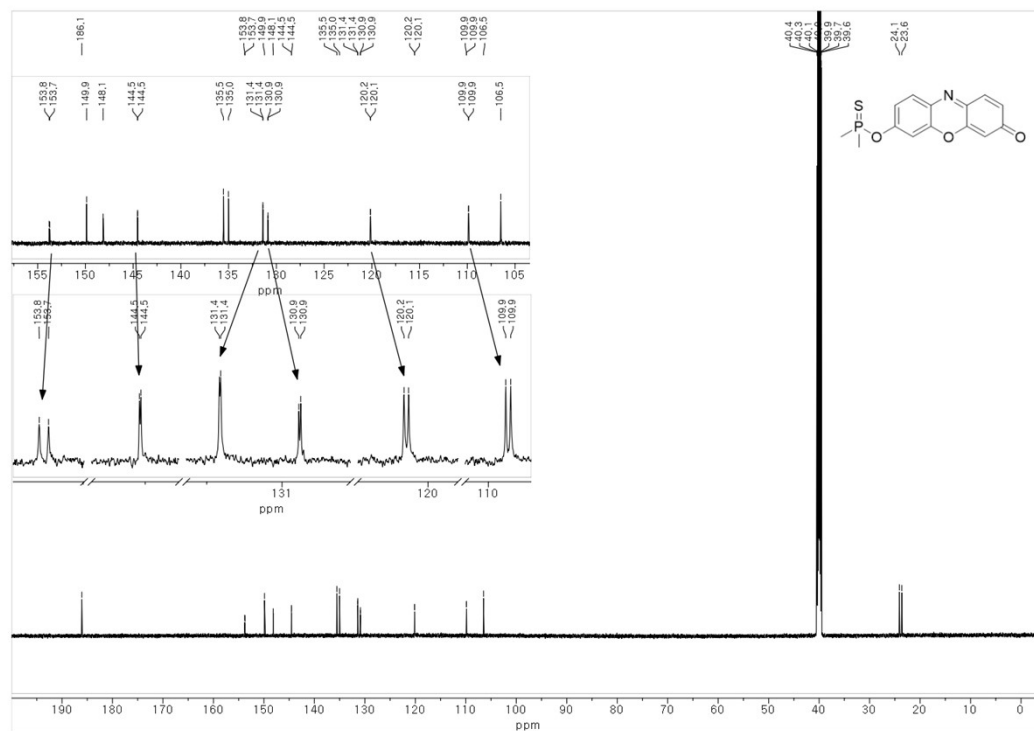

Fig. S14.  $^{13}\text{C}$  NMR spectrum of MP-1 in  $\text{DMSO-}d_6$  (150 MHz).

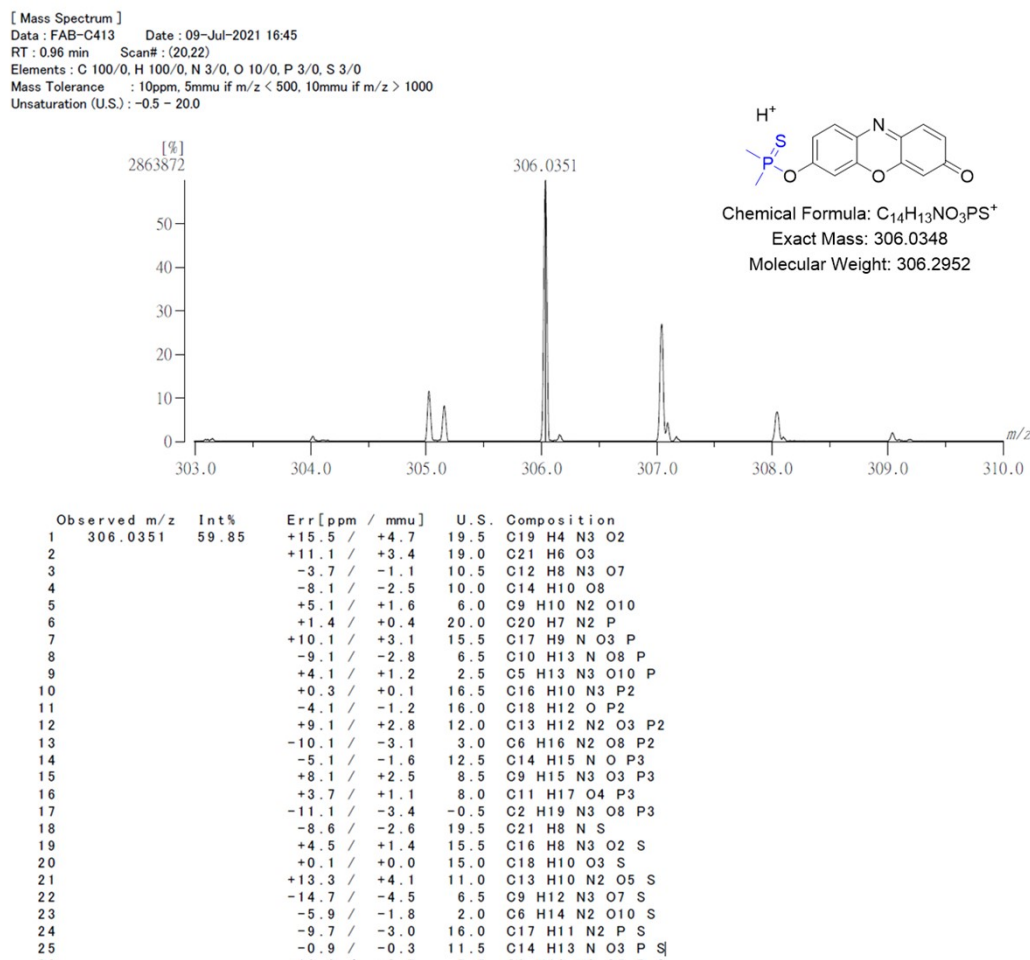

Fig. S15. High-resolution FAB mass spectrum of MP-1.

## References.

- S1. D. C. Harris, in *Quantitative Chemical Analysis*, 8th ed., Freeman, New York, 2010, pp. 103–105.
- S2. A. Kumar, D. Kumar and M. Chhibber, *ChemistrySelect*, 2020, **5**, 13738–13747.
- S3. M. Rana, M. Balcioglu, N. M. Robertson, M. S. Hizir, S. Yumack and M. V. Yigit, *Chem. Sci.*, 2017, **8**, 1200–1208.
- S4. S. Zhu, Y. Zhuo, H. Miao, D. Zhong and X. Yang, *Luminescence*, 2015, **30**, 631–636.
- S5. J. He, H. Zhang, J. Zou, Y. Liu, J. Zhuang, Y. Xiao, B. Lei, *Biosens. Bioelectron.*, 2016, **79**, 531–535.
- S6. P. Singh and P. Sharma, *J. Photochem. Photobiol. A-Chem.*, 2021, **408**, 113096.
- S7. C. Li, Q. Niu, J. Wang, T. Wei, T. Li, J. Chen, X. Qin, Q. Yang, *Spectroc. Acta Pt. A-Molec. Biomolec. Spectr.*, 2020, **233**, 118208.
- S8. H. Tan, Y. Zhang, Y. Chen, *Sens. Actuator B-Chem.*, 2011, **156**, 120–125.
